# Supplementary material for: Does COVID-19 Increase the Risk of Subsequent Kidney Diseases More Than Influenza? A Retrospective Cohort Study Using Real-World Data In the United States
Source: bioRxiv or medRxiv preprint supplement (doi:10.1101/2024.06.27.24309556), 2024-06-28

**Supplementary Table 1:** Diagnosis codes of the International Classification of Diseases 10th editions, Clinical Modification (ICD-10-CM), used to describe baseline/preexisting clinical medical conditions

| <b>Variables</b>                | <b>ICD-10 codes</b>                                                                                                                                                                             |
|---------------------------------|-------------------------------------------------------------------------------------------------------------------------------------------------------------------------------------------------|
| COVID-19 diagnosis              | U07.1, B97.29, J12.82, B34.2, J12.81.                                                                                                                                                           |
| Influenza                       | J09, J10, J11                                                                                                                                                                                   |
| Acute kidney injury             | N17                                                                                                                                                                                             |
| Chronic kidney disease          | N18                                                                                                                                                                                             |
| End-stage renal disease         | Dialysis (Z99.2), Kidney transplant (Z94.0)                                                                                                                                                     |
| Glomerular diseases             | N00-N08                                                                                                                                                                                         |
| Congestive Heart Failure        | I099, I110, I130, I132, I255, I420, I425, I426, I427, I428, I429, I43, I50, P290                                                                                                                |
| Cardiac arrhythmia              | I441, I442, I443, I456, I459, I47, I48, I49, R000, R001, R008, T821, Z450, Z950                                                                                                                 |
| Valvular disease                | A520, I05, I06, I07, I08, I091, I098, I34, I35, I36, I37, I38, I39, Q230, Q231, Q232, Q233, Z952, Z953, Z954                                                                                    |
| Pulmonary circulation disorders | I26, I27, I280, I288, I289                                                                                                                                                                      |
| Peripheral vascular disorders   | I70, I71, I731, I738, I739, I771, I790, I792, K551, K558, K559, Z958, Z959                                                                                                                      |
| Hypertension                    | I10, I11, I12, I13, I15                                                                                                                                                                         |
| Chronic Pulmonary Disease       | I27.x, J40.x-J47.x, J60.xJ68.x, J70.x                                                                                                                                                           |
| Mild Liver Disease              | B18.x, K70.x K71.x, K73.x, K74.x, K76.x, Z94.x                                                                                                                                                  |
| Diabetes                        | E10.x-E14.x                                                                                                                                                                                     |
| Obesity                         | E66                                                                                                                                                                                             |
| Depression                      | F204, F313, F314, F315, F32, F33, F341, F412, F432                                                                                                                                              |
| Smoking                         | ICD-10: F17, Z716, Z720, T652, O9933, Z87891<br>CPT: 99406, 99407, G0375, G0376, G0436, G0437, G9016, G9276, G9458, G8402, G8403, G8453, G8454, S4990, S4991, S4995, S9075, S9453, 4000F, 4001F |

Drinking

F10, K70, T51, G312, G621, G721, I426, K292, K852,  
K860, Y912, Y913

**Supplementary Table 2:** Hazard Ratios for Kidney Diseases Based on COVID-19 or Influenza Status, Stratified by Diabetes, Cardiovascular Disease, and Chronic Pulmonary Disease

| Variables                        | Negative Control | COVID-19          | Influenza         | P-interaction |
|----------------------------------|------------------|-------------------|-------------------|---------------|
| <b>Diabetes</b>                  |                  |                   |                   | 0.2192        |
| Yes                              | 1 (Ref.)         | 1.82 (1.68, 1.98) | 1.16 (0.95, 1.43) |               |
| No                               | 1 (Ref.)         | 1.95 (1.88, 2.03) | 1.09 (1.00, 1.19) |               |
| <b>Cardiovascular Disease</b>    |                  |                   |                   | 0.5561        |
| Yes                              | 1 (Ref.)         | 1.85 (1.68, 2.02) | 1.10 (0.89, 1.38) |               |
| No                               | 1 (Ref.)         | 1.94 (1.88, 2.02) | 1.10 (1.01, 1.20) |               |
| <b>Chronic Pulmonary Disease</b> |                  |                   |                   | 0.0577        |
| Yes                              | 1 (Ref.)         | 1.61 (1.35, 1.89) | 1.00 (0.72, 1.38) |               |
| No                               | 1 (Ref.)         | 1.95 (1.88, 2.02) | 1.11 (1.02, 1.20) |               |

**Supplementary Figure 1:** log-log survival curves for checking the PH assumption for COVID-19 group and Negative Control groups were almost parallel and the proportional hazard assumption was satisfied

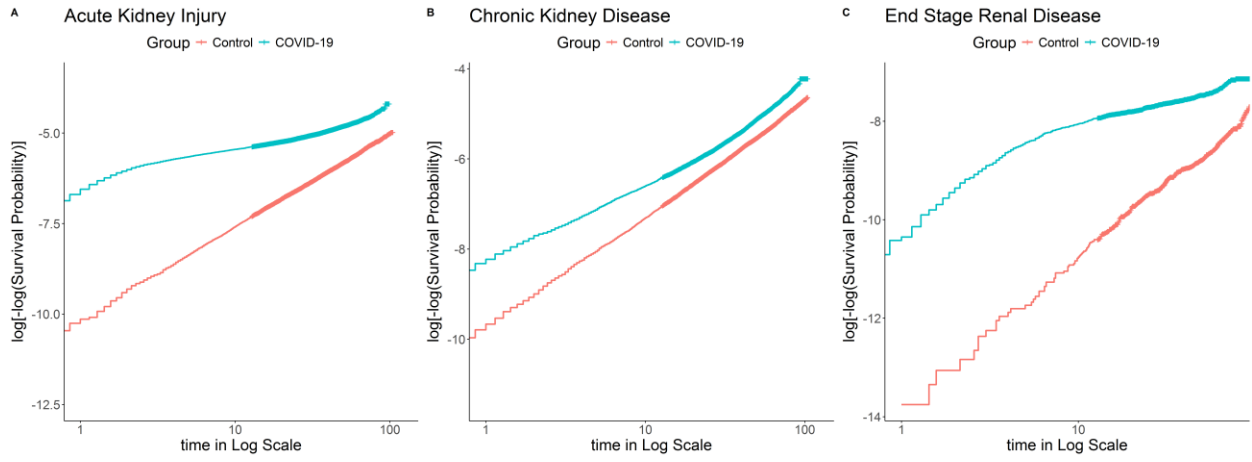

Supplement: Supplementary file [file media-1.pdf]
